# Supplementary material for: Recognition and optical sensing of amines by a quartz-bound 7-chloro-4-quinolylazopillar[5]arene monolayer
Source: Royal Society of Chemistry journal article supplement (doi:10.1039/c8ra06792a), 2018-01-01
Supplement: c8ra06792a1.pdf [file c8ra06792a1.pdf]

## Electronic Supplementary Information

### Recognition and optical sensing of amines by a quartz-bound 7-chloro-4-quinolylazopillar[5]arene monolayer

Ilenia Pisagatti,<sup>a</sup> Giuseppe Gattuso,<sup>a</sup> Anna Notti,<sup>a</sup> Melchiorre F. Parisi,<sup>\*a</sup>  
Giovanna Brancatelli,<sup>‡b</sup> Silvano Geremia,<sup>b</sup> Francesco Greco,<sup>c,d</sup> Salvatrice Millesi,<sup>c,d</sup>  
Andrea Pappalardo<sup>c,d</sup> Luca Spitaleri,<sup>c,d</sup> and Antonino Gulino<sup>\*c,d</sup>

---

<sup>a</sup>*Dipartimento di Scienze Chimiche, Biologiche, Farmaceutiche ed Ambientali, Università di Messina, Viale F. Stagno d'Alcontres 31, 98166 Messina, Italy. E-mail: [mparisi@unime.it](mailto:mparisi@unime.it)*

<sup>b</sup>*Centro di Eccellenza in Biocristallografia, Dipartimento di Scienze Chimiche e Farmaceutiche, Università di Trieste, via L. Giorgieri 1, 34127 Trieste, Italy.*

<sup>c</sup>*Dipartimento di Scienze Chimiche, Università di Catania, Viale Andrea Doria 6, 95125 Catania, Italy. E-mail: [agulino@unict.it](mailto:agulino@unict.it)*

<sup>d</sup>*I.N.S.T.M. UdR of Catania, Viale Andrea Doria 6, 95125 Catania, Italy.*

<sup>‡</sup> *Current address: Crystallics B.V., Meibergdreef 31, 1105 AZ, Amsterdam, The Netherlands.*

| <b>Contents</b>                                                                                                      | <b>page</b> |
|----------------------------------------------------------------------------------------------------------------------|-------------|
| X-ray Studies                                                                                                        | S2          |
| <b>Table S1</b> Crystal data and structure refinement for <b>QAP5</b>                                                | S3          |
| <b>Fig. S1</b> The crystal structure of <b>QAP5</b>                                                                  | S4          |
| <b>Fig. S2</b> The molecular packing of <b>QAP5</b>                                                                  | S4          |
| <b>Fig. S3</b> <sup>1</sup> H NMR spectrum of <b>QAP5</b>                                                            | S5          |
| <b>Fig. S4</b> HSQC NMR spectrum of <b>QAP5</b>                                                                      | S5          |
| <b>Fig. S5</b> AFM micrograph of <b>QAP5</b> _ML                                                                     | S6          |
| <b>Fig. S6</b> UV-vis spectra of <b>QAP5</b> and <b>QAP5</b> _ML in different solvents                               | S6          |
| <b>Fig. S7</b> UV-vis spectra of 7-chloro-4-quinolylazophenol upon addition of <i>n</i> -butylamine                  | S7          |
| <b>Fig. S8</b> UV-vis titration experiment of <b>QAP5</b> with <i>n</i> -butylamine                                  | S7          |
| <b>Fig. S9</b> UV-vis titration experiment of <b>QAP5</b> with 1,8-diaminooctane                                     | S7          |
| <b>Fig. S10</b> UV-vis titration experiment of <b>QAP5</b> with dansylcadaverine                                     | S7          |
| <b>Fig. S11</b> <sup>1</sup> H NMR titration experiment of <b>QAP5</b> with 1,8-diaminooctane                        | S8          |
| <b>Fig. S12</b> Non-linear curve-fitting of the <sup>1</sup> H NMR titration data ( <b>QAP5</b> / 1,8-diaminooctane) | S8          |
| <b>Fig. S13</b> Emission titration spectra of dansylcadaverine upon addition of <b>QAP5</b>                          | S9          |
| <b>Fig. S14</b> Non-linear curve-fitting of the emission intensity changes <b>QAP5</b> with dansylcadaverine         | S9          |

## X-ray Studies

**Crystal Structure Determination of pillar[5]arene QAP5:** data collections were carried out at the Macromolecular Crystallography XRD1 beamline of the Elettra synchrotron (Trieste, Italy), by employing the rotating-crystal method and the cryo-cooling technique. Routinely a crystal dipped in Paratone®, as cryo-protectant, was mounted on a loop and immediately flash-frozen under a liquid nitrogen stream at a 100 K. The diffraction data of QAP5 were indexed and integrated using the XDS package.<sup>1</sup> Scaling was carried out with XSCALE.<sup>2</sup>

The crystal analyzed was rather small and, as a result, it was necessary to use a synchrotron radiation coupled with cryo-cooling techniques to collect a dataset of sufficient quality to solve and refine the structure. The structure was solved by direct methods using SIR2011.<sup>3</sup> Non-hydrogen atoms at full occupancy, or with population equal to, or higher than, 0.6 were anisotropically (hydrogen atoms added at the calculated positions, excluded the solvent molecules) refined by full-matrix least-squares methods on  $F^2$  using SHELXL-13.<sup>4</sup> Restraints on the geometrical and thermal parameters of the disordered solvent molecules (DFIX, SIMU) were introduced during the last refinement cycles.

The structure of **QAP5** showed severe disorder, especially in the solvent component: tetrachloroethane molecules were refined at 0.7 of partial occupancy and the  $-\text{CHCl}_2$  groups were seen to adopt two different orientations, both refined at equal occupancy. Nine methanol molecules were located: one at full occupancy (the one bridging two adjacent pillar[5]arene molecules), one refined at 0.6, one disordered over three positions refined at 0.5, 0.25, 0.25, respectively, one was found disordered over two positions refined at 0.35 and 0.4, respectively and the last one was refined at 0.4 of partial occupancy. Also a water molecule was refined at half occupancy. Among solvent molecules, hydrogen atoms were added only on the methanol at full occupancy and on the tetrachloroethane molecule. Crystallographic data and refinement details are reported in Table S1.

---

1 W. Kabsch, *Acta Crystallogr.*, 2010, **D66**, 125–132.

2 W. Kabsch, *Acta Crystallogr.*, 2010, **D66**, 133–144.

3 M. C. Burla, R. Caliendo, M. Camalli, B. Carrozzini, G. L. Cascarano, L. De Caro, C. Giacovazzo, G. Polidori, D. Siliqi and R. Spagna, *J. Appl. Crystallogr.*, 2007, **40**, 609–613.

4 G. M. Sheldrick, *Acta Crystallogr.*, 2008, **A64**, 112–122.

**Table S1** Crystal data and structure refinement for **QAP5**

| <b>QAP5</b>                                         |                                                                                                                                                                         |
|-----------------------------------------------------|-------------------------------------------------------------------------------------------------------------------------------------------------------------------------|
| Empirical formula                                   | C <sub>52</sub> H <sub>50</sub> N <sub>3</sub> O <sub>9</sub> Cl, 4.25 (CH <sub>3</sub> OH), 0.7 (C <sub>2</sub> H <sub>2</sub> Cl <sub>4</sub> ), 0.5 H <sub>2</sub> O |
| Formula weight                                      | 1159.1 <sup>a</sup>                                                                                                                                                     |
| Temperature (K)                                     | 100(2)                                                                                                                                                                  |
| Wavelength (Å)                                      | 0.8000                                                                                                                                                                  |
| Crystal system                                      | Monoclinic                                                                                                                                                              |
| Space group                                         | <i>P</i> 2 <sub>1</sub> /n                                                                                                                                              |
| Unit cell dimensions (Å, °)                         | <i>a</i> = 12.576(2), <i>α</i> = 90<br><i>b</i> = 33.286(1), <i>β</i> = 95.981(3)<br><i>c</i> = 14.585(2), <i>γ</i> = 90                                                |
| Volume (Å <sup>3</sup> )                            | 6072.1(13)                                                                                                                                                              |
| <i>Z</i>                                            | 4                                                                                                                                                                       |
| <i>ρ</i> <sub>calcd</sub> (g/cm <sup>3</sup> )      | 1.268 <sup>a</sup>                                                                                                                                                      |
| <i>μ</i> (mm <sup>-1</sup> )                        | 0.339                                                                                                                                                                   |
| F(000)                                              | 2443.6 <sup>a</sup>                                                                                                                                                     |
| Reflections collected                               | 39700                                                                                                                                                                   |
| Independent reflections                             | 11904 [R(int) = 0.0878]                                                                                                                                                 |
| Data / restraints / parameters                      | 11904 / 20 / 784                                                                                                                                                        |
| GooF                                                | 1.043                                                                                                                                                                   |
| Final <i>R</i> indices [ <i>I</i> > 2σ( <i>I</i> )] | <i>R</i> <sub>1</sub> = 0.1059, <i>wR</i> <sub>2</sub> = 0.2726                                                                                                         |
| <i>R</i> indices (all data)                         | <i>R</i> <sub>1</sub> = 0.1096, <i>wR</i> <sub>2</sub> = 0.2763                                                                                                         |
| CCDC code                                           | 1536000                                                                                                                                                                 |

<sup>a</sup> The FW, density and F(000) were corrected by taking also into account the hydrogen atoms present in the water and methanol molecules not included in the crystallographic model.

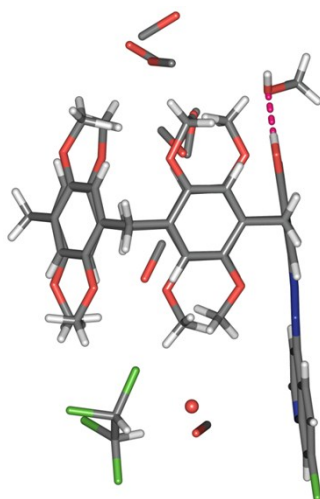

**Fig. S1** The asymmetric unit of the crystal structure of quinolyazo-pillar[5]arene **QAP5** showing the presence of several disordered methanol molecules within the cavity and its vicinity. A disordered tetrachloroethane molecule is also seen next to the quinolyazo moiety.

a)

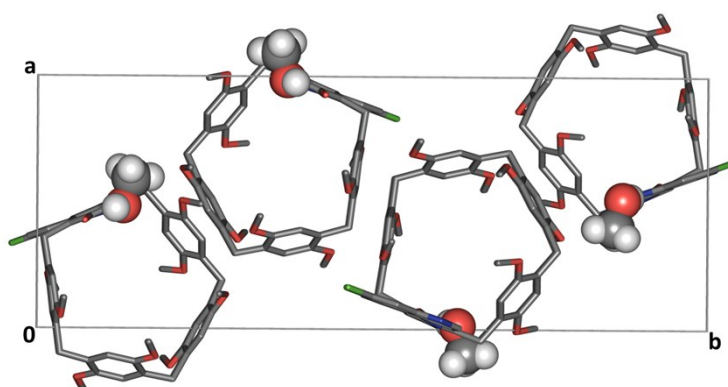

b)

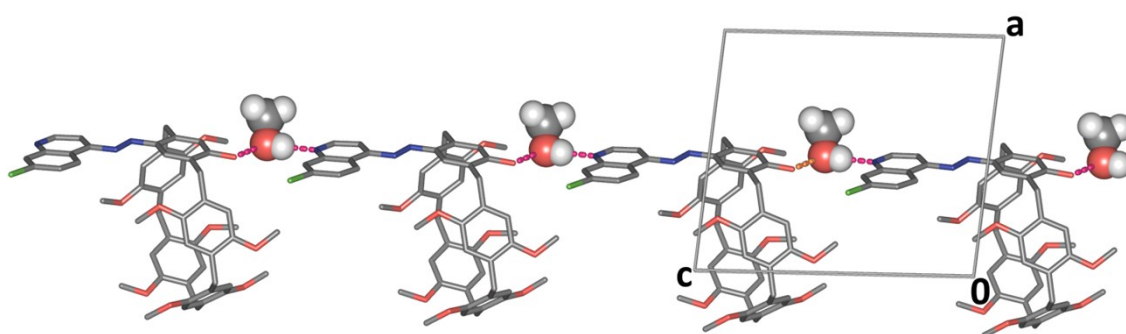

**Fig. S2** One-dimensional channels seen in the molecular packing of **QAP5**: a) view of the pentagonal-shaped channels, orthogonal to the *ab* plane and b) view along the *c* axis of the pillar[5]arene molecules; channel propagation is provided by bridging methanol molecules concomitantly acting as hydrogen-bond acceptors ( $\text{OH} \cdots \text{O}_{\text{Me}}$  2.647(3) Å) and hydrogen-bond donors ( $\text{OH}_{\text{Me}} \cdots \text{N}$  2.717(4) Å). The bridging methanol molecules are conveniently depicted with Van der Waals spheres.

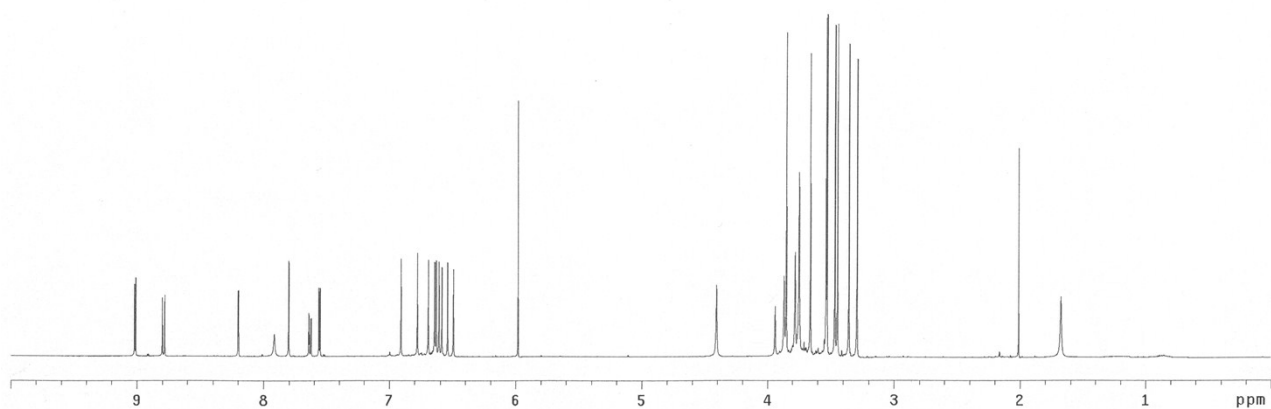

**Fig. S3** <sup>1</sup>H NMR spectrum (500 MHz, TCE-d<sub>2</sub>, 298 K) of 7-chloro-4-quinolylazo-octamethoxypillar[5]arene (QAP5).

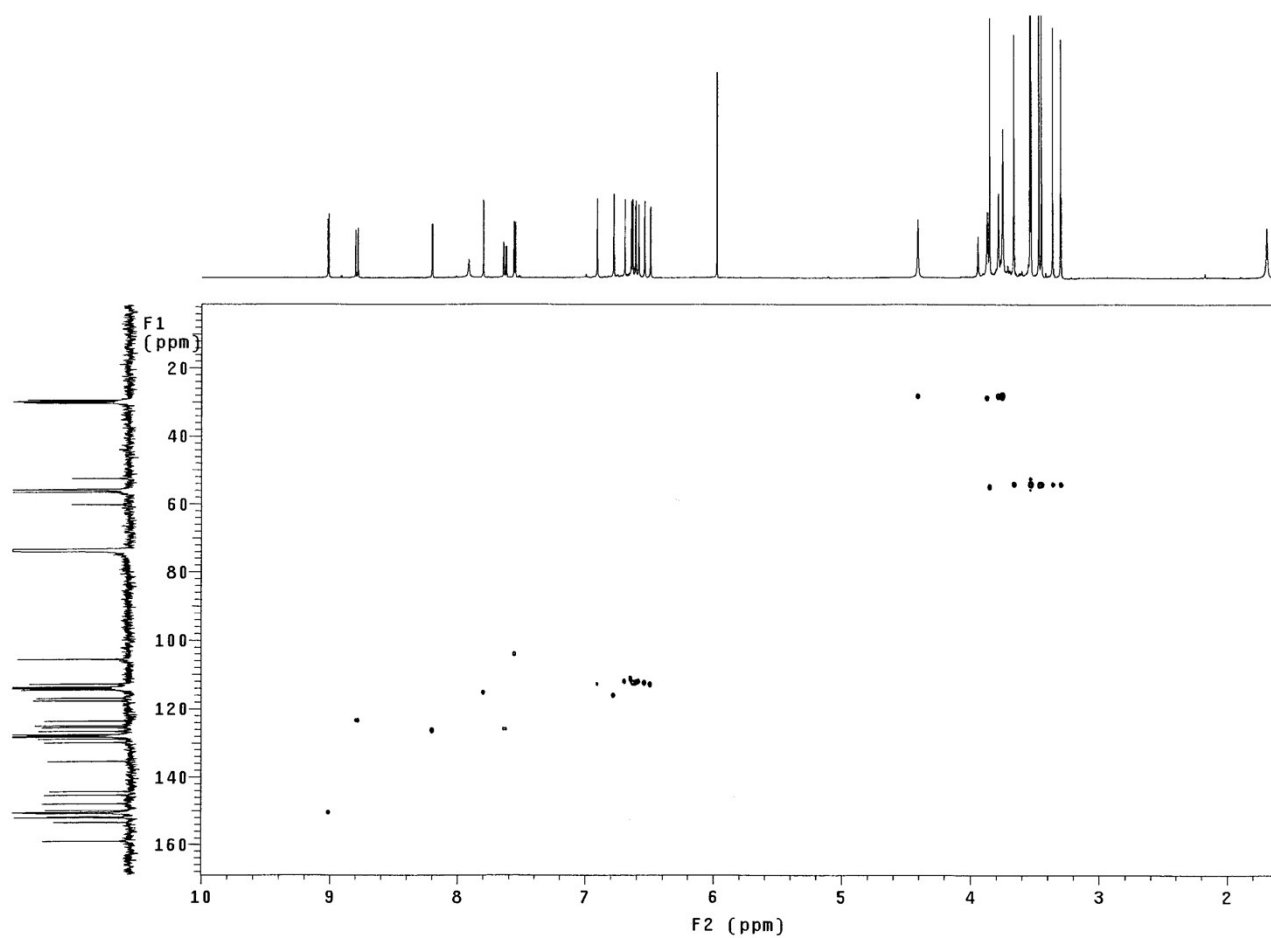

**Fig. S4** HSQC NMR spectrum (TCE-d<sub>2</sub>, 298 K) of 7-chloro-4-quinolylazo-octamethoxy-pillar[5]arene (QAP5).

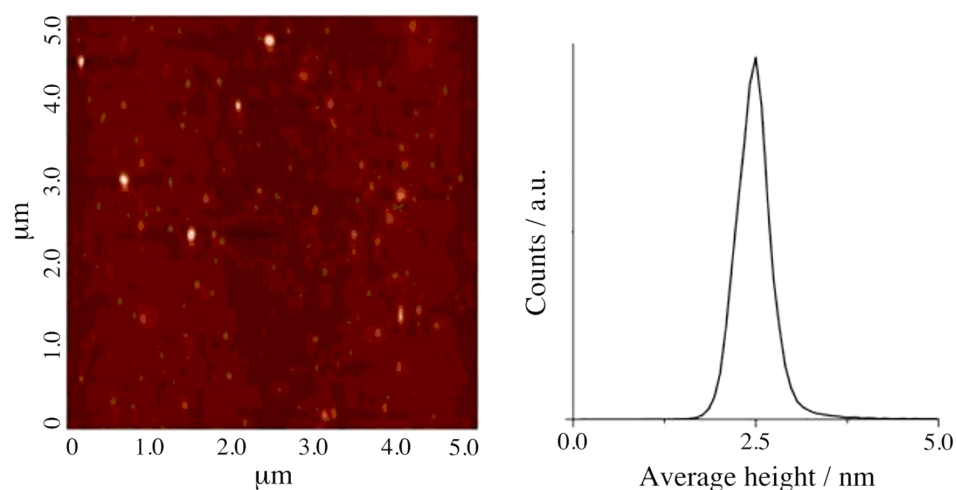

**Fig. S5** AFM micrograph of a representative **QAP5\_ML** (left) and related cross-section profile (right).

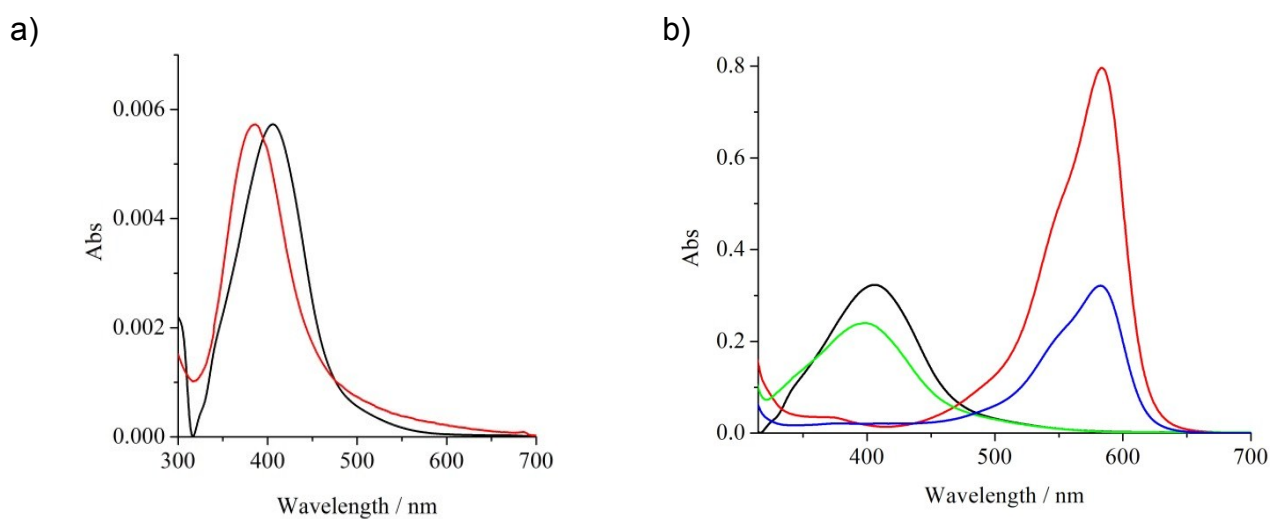

**Fig. S6** UV-vis spectra of: a) a  $1.8 \times 10^{-7}$  M **QAP5** toluene solution (black trace) and a **QAP5\_ML** (red trace); b)  $1.0 \times 10^{-5}$  M **QAP5** solutions in DMSO, TCE and toluene (red, green and black traces, respectively). The additional blue trace refers to a  $2.1 \times 10^{-5}$  M DMSO solution of **QAP5** as the sodium salt.<sup>5</sup>

<sup>5</sup> The sodium salt of **QAP5** was obtained by treating **QAP5** with a NaOH (1 equiv) H<sub>2</sub>O/DMSO (1:1) solution, upon solvent removal under reduced pressure.

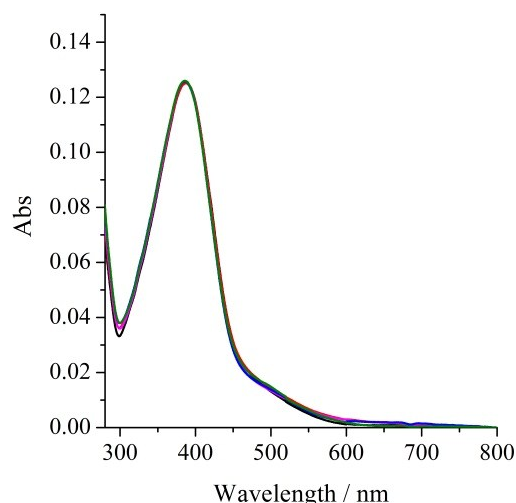

**Fig. S7** UV-vis spectra of a  $1.07 \times 10^{-5}$  M TCE solution of 4-(7-chloro-4-quinolylazo)-2,5-dimethylphenol (**QA**) upon subsequent additions of a  $1.43 \times 10^{-3}$  M TCE solution of *n*-butylamine (up to 100 equiv).

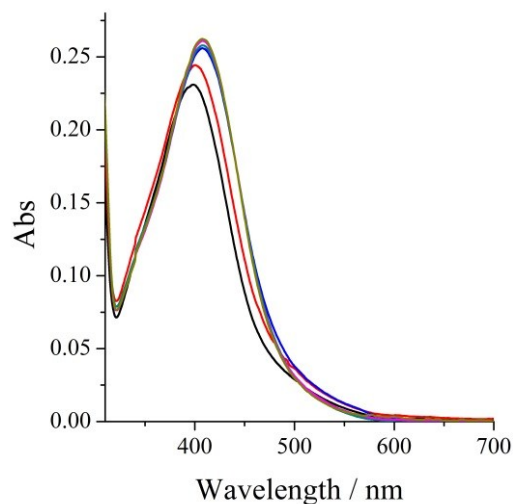

**Fig. S8** UV-vis titration experiment of a TCE solution of **QAP5** ( $1.0 \times 10^{-5}$  M) with a  $1.33 \times 10^{-3}$  M TCE *n*-butylamine solution:  $[\text{QAP5}] / [n\text{-butylamine}] = 1:0, 1:1, 1:5, 1:10, 1:20$  and  $1:50$ ; black, red, blue, cyan, magenta and yellow traces, respectively. All spectra have been corrected for the volume variation.

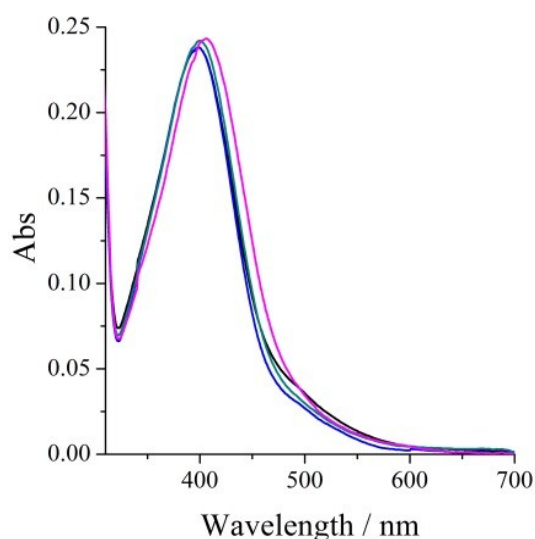

**Fig. S9** UV-vis titration experiment of a TCE solution of **QAP5** ( $1.0 \times 10^{-5}$  M) with a  $1.33 \times 10^{-3}$  M TCE 1,8-diaminooctane solution:  $[\text{QAP5}]/[1,8\text{-diaminooctane}] = 1:0, 1:5, 1:10$ , and  $1:100$ ; black, blue, cyan, and magenta traces, respectively. All spectra have been corrected for the volume variation.

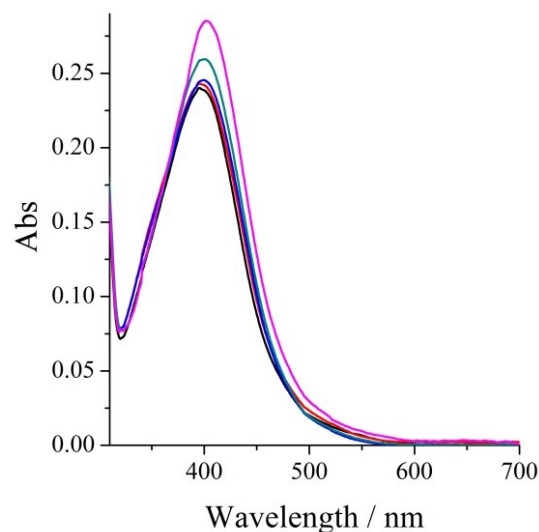

**Fig. S10** UV-vis titration experiment of a TCE solution of **QAP5** ( $1.0 \times 10^{-5}$  M) with a  $1.33 \times 10^{-3}$  M TCE dansylcadaverine solution:  $[\text{QAP5}]/[\text{dansylcadaverine}] = 1:0, 1:10, 1:50$  and  $1:100$ ; black, red, blue, green, and magenta traces, respectively. All spectra have been corrected for the volume variation.

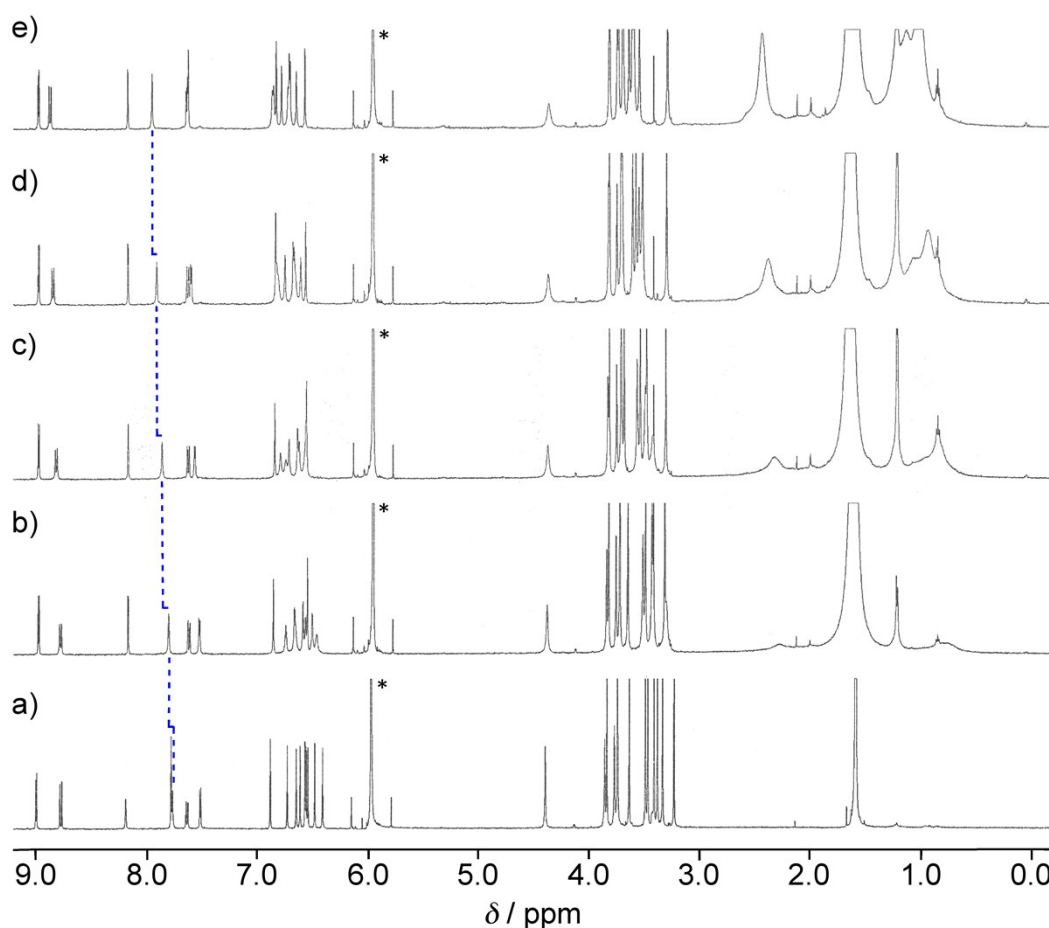

**Fig. S11**  $^1\text{H}$  NMR spectra (500 MHz,  $\text{TCE-}d_2$ , 298 K) of a) [QAP5] = 1.0 mM; b) [QAP5] = 1.0 and [1,8-diaminooctane] = 0.4 mM; c) [QAP5] = 1.0 and [1,8-diaminooctane] = 1.3 mM; d) [QAP5] = 1.0 and [1,8-diaminooctane] = 2.8 mM and e) [QAP5] = 1.0 and [1,8-diaminooctane] = 4.7 mM. Asterisks designate the residual solvent peak.

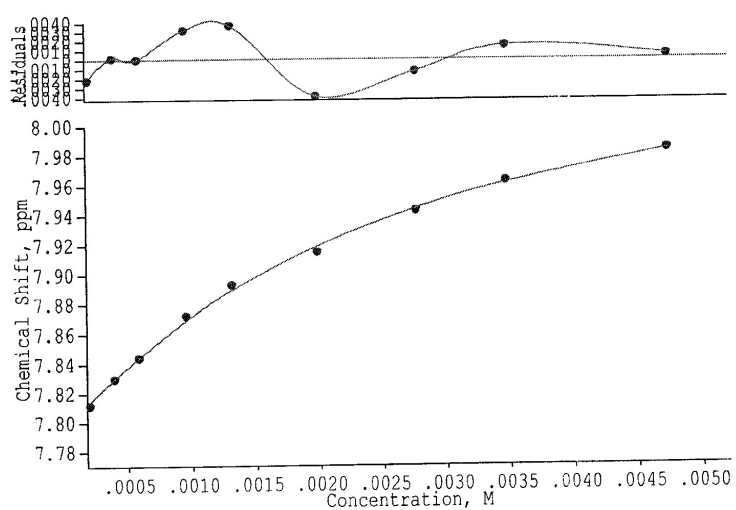

**Fig. S12** Non-linear curve-fitting of the  $^1\text{H}$  NMR (500 MHz, 298 K) chemical shift changes of a 1.0 mM  $\text{TCE-}d_2$  solution of QAP5 upon addition of increasing amounts of 1,8-diaminooctane.

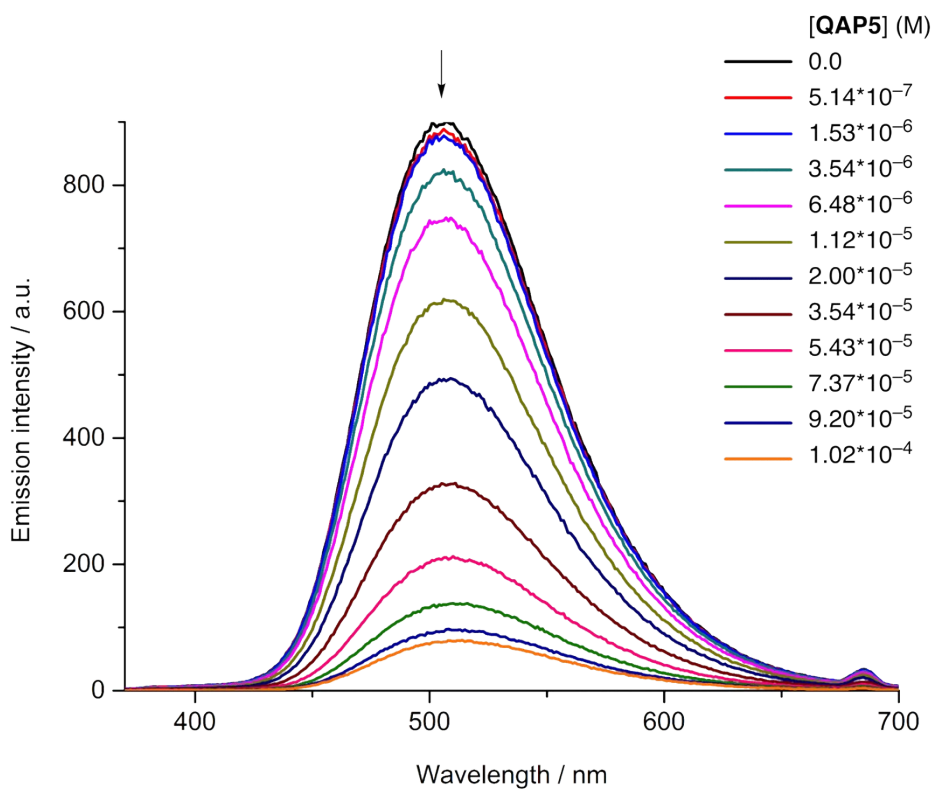

**Fig. S13** Emission titration spectra ( $\lambda_{\text{exc}} = 340 \text{ nm}$ ) of a TCE solution of [dansylcadaverine] =  $9.9 \times 10^{-6} \text{ M}$  upon addition of increasing amounts of a **QAP5** TCE solution at  $25^\circ \text{C}$ .

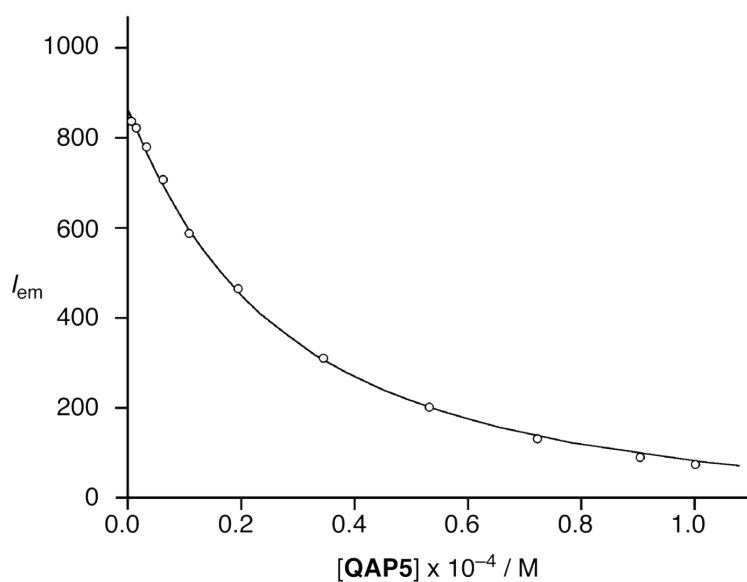

**Fig. S14** Non-linear curve-fitting of the emission intensity changes ( $\lambda = 510 \text{ nm}$ ) of a TCE solution of [dansylcadaverine] =  $9.9 \times 10^{-6} \text{ M}$  upon addition increasing amounts of a **QAP5** TCE solution.
